# Supplementary material
Source: Springer Nature journal article supplement (https://www.springermedizin.de/resource/supplementary/13012_2013_648_MOESM2_ESM.pdf/9630450)

## Funders

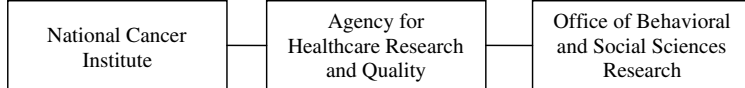

## Project coordination

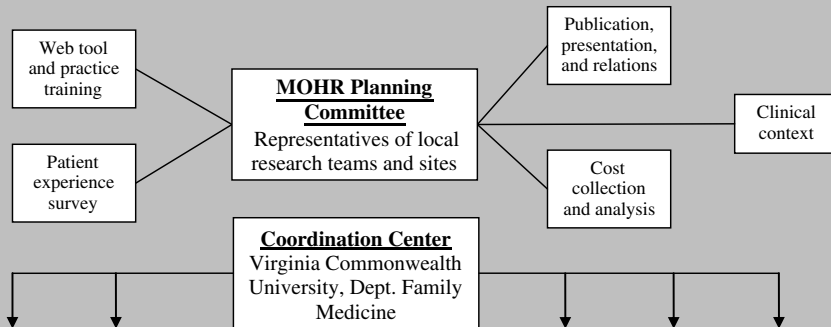

## Local Research Teams

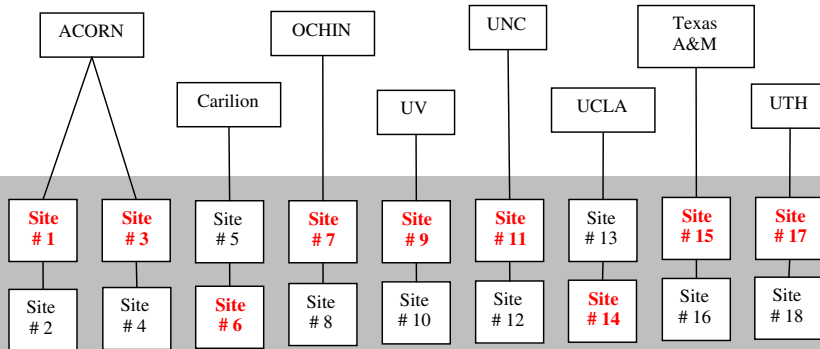

## Study practices

Supplement: MOESM2 [file 9630450]
